# Supplementary material
Source: PubMed Central journal article supplement (PMC5421609)

Structure and mechanism of benzaldehyde dehydrogenase from  
*Pseudomonas putida* ATCC 12633, a member of the class 3 aldehyde  
dehydrogenase superfamily

Megan P.D. Zahniser,<sup>1</sup> Shreenath Prasad,<sup>2</sup> Malea M. Kneen,<sup>2</sup> Cheryl A.  
Kreinbring,<sup>1</sup> Gregory A. Petsko,<sup>1,3,4</sup> Dagmar Ringe<sup>1,3,5</sup> and Michael J. McLeish<sup>2,\*</sup>

<sup>1</sup>*Department of Biochemistry, Brandeis University, 415 South St., Waltham, MA 02454 USA*

<sup>2</sup>*Department of Chemistry and Chemical Biology, Indiana University-Purdue University  
Indianapolis (IUPUI)402 N. Blackford Street, Indianapolis, IN 46202 USA*

<sup>3</sup>*Rosenstiel Basic Medical Sciences Research Center, MS029, 415 South Street, Waltham, MA  
02454 USA*

<sup>4</sup>*Present address: Appel Alzheimer's Disease Research Institute, Weill Cornell Medical College,  
New York, NY 10021 USA*

<sup>5</sup>*Department of Chemistry, Brandeis University, 415 South St., Waltham, MA 02454 USA*

**Supporting material**

**Table S1. Primers employed to generate *Pp*BADH variants<sup>a</sup>**

| <b>Variant</b> | <b>Sequence of forward primer</b>                              |
|----------------|----------------------------------------------------------------|
| E215D          | 5'-CCTGTCGTTCTAG <u>A</u> tCTCGGTGGTAAGTGCCC-3'                |
| E215Q          | 5'-CCTGTCGTTCTA <u>c</u> AACTCGGTGGTAAGTGCCC-3'                |
| E215L          | 5'-CCTGTCGTTCTA <u>ctc</u> CTCGGTGGTAAGTGCCC-3'                |
| E337D          | 5'-CCTCTGATGTCCGAG <u>G</u> A <sub>t</sub> CTTTTCGGCCCTATTC-3' |
| E337Q          | 5'-CCTCTGATGTCCGAG <u>c</u> AGCTTTTCGGCC-3'                    |
| E337L          | 5'-CCTCTGATGTCCGAG <u>ctc</u> CTTTTCGGCC-3'                    |

<sup>a</sup>The mutated codon is underlined, and lowercase indicates a base change from wild-type.



**Figure S2.** (A) Overlay of the cofactors of *Pp*BADH (NADP<sup>+</sup>, PDB 5UCD) and *h*ALDH3 (NAD<sup>+</sup>, PDB 4L2O) highlighting the movement of Glu146 to avoid the clash with the additional phosphate of NADP<sup>+</sup>. (B) Overlay of the cofactors of *Pp*BADH (PDB 5UCD) and *Pa*BALDH (PDB 2WME) showing the similarity of mechanism used to hold the glutamic acid away from the phosphate. In both cases *Pp*BADH is in grey.

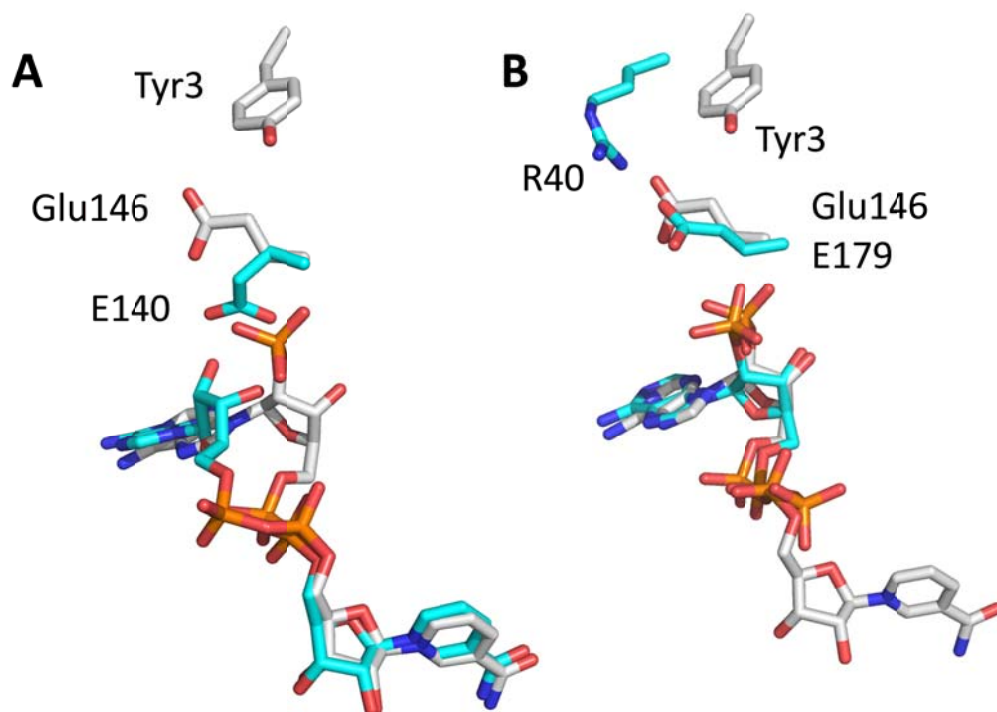

Supplement: ZahniseretalSI.pdf [file ZahniseretalSI.pdf]
